# Supplementary material for: Mesenchyme-derived factors enhance preneoplastic growth by non-genotoxic carcinogens in rat liver
Source: PubMed Central journal article supplement — Arch Toxicol. 2017 Dec 21;92(2):953–66. doi: 10.1007/s00204-017-2080-0 (PMC5818586; doi:10.1007/s00204-017-2080-0), 2017-12-21
Supplement: 204_2017_2080_MOESM1_ESM.pdf [file 204_2017_2080_MOESM1_ESM.pdf]

## ELECTRONIC SUPPLEMENTARY MATERIAL

**Table S1. Cytokines and chemicals used in-vitro, assays applied for RT-qPCR, and antisera used for immunodetection.**

| <b>TREATMENT AGENTS</b>                                           |                                    |                                     |                                |
|-------------------------------------------------------------------|------------------------------------|-------------------------------------|--------------------------------|
| <b>Agent</b>                                                      | <b>Concentration used in-vitro</b> | <b>Solvent</b>                      | <b>Supplier</b>                |
| Recombinant human EGF (epidermal growth factor)                   | 10 ng/ml                           | Culture medium                      | Sigma, St. Louis, MO           |
| Recombinant human TGF $\alpha$ (transforming growth factor alpha) | 10 ng/ml                           | Culture medium                      | UBI, Lake Placid, NY           |
| Recombinant human HBEGF (heparin-binding EGF-like growth factor)  | 1-50 ng/ml                         | Culture medium                      | Sigma, St. Louis, MO           |
| Recombinant human FGF1 (fibroblast growth factor 1)               | 10 ng/ml                           | Culture medium                      | Biovision, Old Middlefield, CA |
| Recombinant human FGF2 (fibroblast growth factor 2)               | 10 ng/ml                           | Culture medium                      | Pepto Tech, Rocky Hill, NJ     |
| Recombinant human FGF4 (fibroblast growth factor 4)               | 10 ng/ml                           | Culture medium                      | Biosource, San Diego, CA       |
| Recombinant human FGF7 (fibroblast growth factor 7)               | 10 ng/ml                           | Culture medium                      | Sigma, St. Louis, MO           |
| Recombinant human FGF9 (fibroblast growth factor 9)               | 10 ng/ml                           | Culture medium                      | R & D Systems, Minneapolis, MN |
| Recombinant human FGF18 (fibroblast growth factor 18)             | 10 ng/ml                           | Culture medium                      | BioVision, Old Middlefield, CA |
| Recombinant human HGF (hepatocyte growth factor)                  | 1-20 ng/ml                         | Culture medium                      | Sigma, St. Louis, MO           |
| Recombinant human HDGF (hepatoma derived growth factor)           | 1-50 ng/ml                         | Culture medium                      | Abcam, Cambridge, GB           |
| Recombinant human CTGF (Connective tissue growth factor)          | 1-100 ng/ml                        | Culture medium                      | Pepto Tech, Rocky Hill, NJ     |
| Recombinant human GDF15 (Growth and differentiation factor 15)    | 1-100 ng/ml                        | Culture medium                      | R&D Systems, Minneapolis, MN   |
| Recombinant human TNF $\alpha$ (Tumor necrosis factor alpha)      | 1-200 ng/ml                        | Culture medium                      | R&D Systems, Minneapolis, MN   |
| Recombinant human IL6 (Interleukin 6)                             | 10-30 ng/ml                        | Culture medium                      | Strathmann, Hamburg, Germany   |
| Recombinant human PGA2 (Prostaglandin A2)                         | 17.5 $\mu$ g/ml                    | Ethanol                             | Biomol, Plymouth Meeting, PA   |
| Recombinant human PGJ2 (Prostaglandin J2)                         | 5 $\mu$ g/ml                       | Ethanol                             | Biomol, Plymouth Meeting, PA   |
| Recombinant human PGE2a (Prostaglandin E2a)                       | 17.5 $\mu$ g/ml                    | Ethanol                             | Biomol, Plymouth Meeting, PA   |
| Recombinant human PGF2a (Prostaglandin F2a)                       | 17.5 $\mu$ g/ml                    | Ethanol                             | Biomol, Plymouth Meeting, PA   |
| Recombinant TGF $\beta$ 1 (transforming growth factor $\beta$ 1)  | 1ng/ml                             | Culture medium                      | Pepto Tech, Rocky Hill, NJ     |
| Phenobarbital (PB; 5-ethyl-5-phenylbarbituric acid)               | 0.5 mM, 1 mM                       | Culture medium                      | Sigma, St. Louis, MO           |
| Cyproterone acetate (CPA)                                         | 10 $\mu$ M                         | DMSO                                | Sigma, St. Louis, MO           |
| <b>ASSAYS/PRIMERS USED FOR RT-qPCR</b>                            |                                    |                                     |                                |
| <b>Transcript to be measured</b>                                  | <b>Assay Number</b>                | <b>Supplier</b>                     |                                |
| $\beta$ 2M (beta2-microglobulin)                                  | Rn00560865_m1                      | Applied Biosystems, Foster City, CA |                                |
| EGF                                                               | Rn00563336_m1                      | Applied Biosystems, Foster City, CA |                                |
| TGF $\alpha$                                                      | Rn00562037_m1                      | Applied Biosystems, Foster City, CA |                                |

|                                             |                        |                                                 |
|---------------------------------------------|------------------------|-------------------------------------------------|
| HBEGF                                       | Rn01637090_g1          | Applied Biosystems, Foster City, CA             |
| EREG                                        | Rn01413923_m1          | Applied Biosystems, Foster City, CA             |
| FGF1                                        | Rn00563362_m1          | Applied Biosystems, Foster City, CA             |
| FGF2                                        | Rn00570809_m1          | Applied Biosystems, Foster City, CA             |
| FGF4                                        | Rn00709726_m1          | Applied Biosystems, Foster City, CA             |
| FGF7                                        | Rn00573319_m1          | Applied Biosystems, Foster City, CA             |
| FGF9                                        | Rn00564116_m1          | Applied Biosystems, Foster City, CA             |
| FGF18                                       | Rn00433286_m1          | Applied Biosystems, Foster City, CA             |
| HGF                                         | Rn01537279_g1          | Applied Biosystems, Foster City, CA             |
| HDGF                                        | Rn00678055_g1          | Applied Biosystems, Foster City, CA             |
| CTGF                                        | Rn00566673_m1          | Applied Biosystems, Foster City, CA             |
| GDF15                                       | Rn00570083_m1          | Applied Biosystems, Foster City, CA             |
| IL1 $\beta$                                 | Rn00580432_m1          | Applied Biosystems, Foster City, CA             |
| TNF $\alpha$                                | Rn99999017_m1          | Applied Biosystems, Foster City, CA             |
| IL6                                         | Rn99999011_m1          | Applied Biosystems, Foster City, CA             |
| COX2 (Cyclooxygenase 2)                     | Rn01483828_m1          | Applied Biosystems, Foster City, CA             |
| <b>ANTISERA APPLIED FOR IMMUNODETECTION</b> |                        |                                                 |
| <b>Protein to be detected</b>               | <b>Antibody number</b> | <b>Supplier</b>                                 |
| Rabbit anti-rat GST-Yp                      | BIO23YPr               | Biotrin Int., Dublin, Ireland                   |
| Goat-anti-rabbit biotin                     | E0432                  | Dako, Glostrup, Denmark                         |
| Rabbit anti-panEGFR                         | #2232                  | Cell Signalling Technology, Cambridge, GB       |
| Rabbit anti-EGFR, phosphorylated at Tyr1173 | #4404                  | Cell Signalling Technology                      |
| <b>ELISA</b>                                |                        |                                                 |
| <b>Protein to be detected</b>               | <b>Number</b>          | <b>Supplier</b>                                 |
| GDF15                                       | MGD150                 | R&D Systems, Minneapolis, MN                    |
| HGF                                         | MHG00                  | R&D Systems, Minneapolis, MN                    |
| TNF $\alpha$                                | 88-7340                | eBioscience, Santa Clara, CA                    |
| IL6                                         | BMS625MST              | Bender MedSystems, Vienna, Austria              |
| PGE2a                                       | ABIN1116703            | Antibodies Online, Aachen, FRG                  |
| HBEGF                                       | Sc 74441               | Santa Cruz Biotechnology Inc., , Santa Cruz, CA |
| <b>NEUTRALIZING ANTIBODIES</b>              |                        |                                                 |
| Anti-HGF                                    | AF 294-NA              | R&D Systems, Minneapolis, MN                    |
| Anti-HBEGF                                  | AF 259-NA              | R&D Systems, Minneapolis, MN                    |

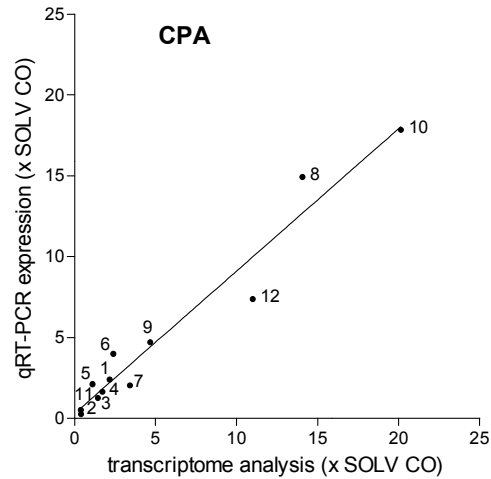

**Figure S1. Validation of transcriptome data by quantitative RT-PCR (RT-qPCR).** HC and MC were isolated from untreated and CPA-treated rats and were subjected to the analysis. Each data point represents the expression level of a given gene expressed as fold solvent CO, and is the mean of  $\geq 3$  independent determinations per method applied. Symbols: 1, CCL4; 2, CTGF; 3, FGF21; 4, GADD45G; 5, GDF15; 6, HDGF; 7, HGF; 8, INHBB; 9, PLK4; 10, LPL; 11, ID4; 12, TUSC3. Genes identified by symbol No 1-10 were determined in MC and No 11+12 in HC. Correlation of the relative expression of the selected genes, as determined by the two independent methods, was calculated by GraphPad Prism (Version 5.0):  $R^2=0.9529$ ;  $p<0.0001$ . Please note that data on the transcriptome validation of HC and MC, obtained from PB-treated animals, have been shown by Riegler et al. 2015.

**ELISA for HBEGF.** Microtiter ELISA plates (Costar, Corning, NY) were coated with the cell supernatants (100 $\mu$ l, 1:1 diluted in 1xPBS (1.44g Na<sub>2</sub>HPO<sub>4</sub>\*2H<sub>2</sub>O, 2.62g NaH<sub>2</sub>PO<sub>4</sub>\*H<sub>2</sub>O, 5.86g NaCl/1000ml, pH7.4)). The standard calibration row was created with recombinant human HBEGF at a concentration range between 0 and 2500pg/ml. The plate was incubated at 4°C overnight. On the next day, the plate was blocked with 250 $\mu$ l PBST (500 $\mu$ l tween 20/1000ml PBS) + 0.5% BSA at room temperature for one hour and was washed twice with PBST (200 $\mu$ l). Then, the monoclonal HBEGF antibody (100 $\mu$ l, 1:50 diluted in PBST + 0.5% BSA, Santa Cruz Biotechnology, Santa Cruz, CA, USA) was applied as primary antibody at room temperature for two hours. After four times washing with PBST, the plate was incubated with the secondary antibody, a biotin labeled anti-mouse antibody (100 $\mu$ l, 1:5000 diluted in PBST + 0.5% BSA, DAKO, Glostrup, Denmark) for 2 hours. After the plate had been washed four times with PBST, the streptavidin conjugated horseradish peroxidase (100 $\mu$ l, 1:5000 diluted in PBST + 0.5% BSA, DAKO) was applied for one hour. Finally the plate was washed with PBST and the reaction was detected with 100 $\mu$ l of the TMB substrate (Thermo Scientific, Rockford, IL). The reaction was stopped with 1M H<sub>3</sub>PO<sub>4</sub> when the highest standard became dark blue. The absorbance was measured in a microplate reader at a wavelength of 450nm and a reference wavelength of 620nm.

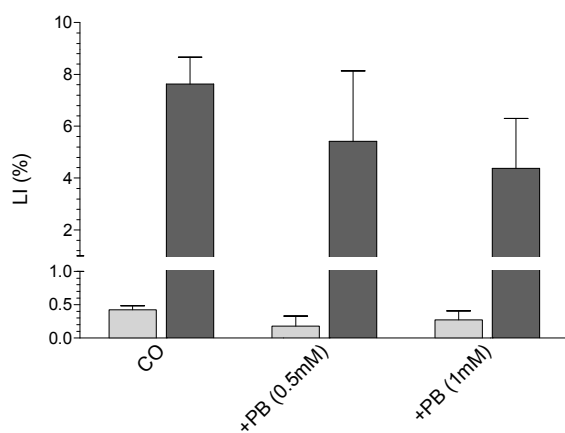

**Figure S2. PB suppresses weakly DNA replication in unaltered (HC) and preneoplastic hepatocytes (HC<sub>PREN</sub>).** NNM was applied to induce the formation of HC<sub>PREN</sub>. Twenty-one days later HC and HC<sub>PREN</sub> were isolated and cultured in serum-free medium. Stock solutions were prepared of PB (PB sodium salt, dissolved in medium). Aliquots were added to the medium to provide final concentrations of 0.5 or 1mM of PB. Treatments started 2hrs after seeding of HC, were renewed at 48hrs and lasted for 72hrs. Autoradiography served to determine the percentage of nuclei with incorporated <sup>3</sup>H-thymidine (LI %). Data are means  $\pm$  SEM from  $\geq 3$  independent experiments. Symbols: light grey bars, HC; dark grey bars, HC<sub>PREN</sub>

**Table S2. Significantly deregulated pathways in rat hepatocytes (HC) and mesenchymal liver cells (MC), treated in-vivo with CPA 1x or 6x on 6 consecutive days.** Pathway enrichments were computed against the databases BiobaseTransPath ([www.biobase-international.com](http://www.biobase-international.com)), Ingenuity Knowledge Base ([www.ingenuity.com](http://www.ingenuity.com)), and KEGG ([www.genome.jp/kegg](http://www.genome.jp/kegg)) using a hypergeometric test. Enrichment analyses were performed separately for upregulated and downregulated genes, respectively. The resulting p-values were corrected for multiple testing using the Benjamini-Hochberg method. Pathways were considered to be significantly deregulated in case of p-value of < 0.05. Please note that data on the pathway analyses in HC and MC, obtained from PB-treated animals, have been shown by Riegler et al, 2015.

| Cell type/<br>time point | Data-base | Pathway                                      | corr. P-value | Regulation | Sample ratio | Back-ground ratio | Gene symbols                                                                                                                                                                                                                                                    |
|--------------------------|-----------|----------------------------------------------|---------------|------------|--------------|-------------------|-----------------------------------------------------------------------------------------------------------------------------------------------------------------------------------------------------------------------------------------------------------------|
| HC/1x                    | KEGG      | BASE_EXCISION_REPAIR                         | 0,000         | up         | 10/210       | 26/3825           | PCNA, FEN1, LIG1, POLB, POLD1, POLD2, POLD3, APEX1, XRCC1, POLE2                                                                                                                                                                                                |
| HC/1x                    | KEGG      | BLADDER_CANCER                               | 0,001         | up         | 9/210        | 34/3825           | MYC, RAF1, KRAS, CCND1, MAPK1, RASSF1, E2F1, MDM2, CDKN1A                                                                                                                                                                                                       |
| HC/1x                    | KEGG      | CELL_CYCLE                                   | 0,000         | up         | 41/210       | 110/3825          | PCNA, YWHAH, CDK1, PTTG1, MYC, GADD45A, CDKN2C, CDC20, CCNB1, WEE1, MCM6, CCND1, GADD45B, MCM3, CCNE1, MCM4, MCM2, MAD2L2, CCNE2, MCM5, ESPL1, ORC6, MAD2L1, CDC45, TTK, CCNA2, RBL1, E2F1, CDC27, MDM2, BUB1B, BUB1, ORC1, YWHAG, CDKN1A, E2F5, MCM7, CCNB2, S |
| HC/1x                    | KEGG      | DNA_REPLICATION                              | 0,000         | up         | 20/210       | 33/3825           | PCNA, FEN1, LIG1, POLD1, RFC2, MCM6, MCM3, MCM4, POLD2, MCM2, MCM5, RFC5, POLD3, POLA2, RPA2, PRIM1, RFC4, MCM7, RFC3, POLE2                                                                                                                                    |
| HC/1x                    | KEGG      | GLIOMA                                       | 0,033         | up         | 9/210        | 55/3825           | RAF1, KRAS, PDGFA, CCND1, MAPK1, SHC1, E2F1, MDM2, CDKN1A                                                                                                                                                                                                       |
| HC/1x                    | KEGG      | GLUTATHIONE_METABOLISM                       | 0,000         | up         | 14/210       | 42/3825           | SRM, GGT1, GSR, GSTM3, GSS, GCLC, GSTM5, GSTM2, GSTA5, RRM1, GPX2, GSTM4, GSTM1, RRM2                                                                                                                                                                           |
| HC/1x                    | KEGG      | HOMOLOGOUS_RECOMBINATION                     | 0,000         | up         | 8/210        | 22/3825           | POLD1, POLD2, RAD51, POLD3, RPA2, RAD51C, XRCC2, RAD54L                                                                                                                                                                                                         |
| HC/1x                    | KEGG      | METABOLISM_OF_XENOBIOTICS_BY_CYTOCHROME_P450 | 0,027         | up         | 7/210        | 34/3825           | GSTM3, GSTM5, GSTM2, GSTA5, GSTM4, GSTM1, EPHX1                                                                                                                                                                                                                 |

|       |         |                                           |       |      |        |          |                                                                                                                                          |
|-------|---------|-------------------------------------------|-------|------|--------|----------|------------------------------------------------------------------------------------------------------------------------------------------|
| HC/1x | KEGG    | MISMATCH_REPAIR                           | 0,000 | up   | 11/210 | 21/3825  | PCNA, LIG1, POLD1, RFC2, POLD2, RFC5, POLD3, EXO1, RPA2, RFC4, RFC3                                                                      |
| HC/1x | KEGG    | NUCLEOTIDE_EXCISION_REPAIR                | 0,000 | up   | 12/210 | 42/3825  | PCNA, LIG1, POLD1, RFC2, GTF2H1, POLD2, RFC5, POLD3, RPA2, RFC4, RFC3, POLE2                                                             |
| HC/1x | KEGG    | OOCYTE_MEIOSIS                            | 0,000 | up   | 19/210 | 97/3825  | YWHAH, CDK1, PTTG1, PPP2CB, CDC20, CCNB1, MAPK1, CCNE1, MAD2L2, CCNE2, AURKA, ESPL1, MAD2L1, CDC27, FBXO5, BUB1, YWHAG, CCNB2, PKMYT1    |
| HC/1x | KEGG    | P53_SIGNALING_PATHWAY                     | 0,000 | up   | 16/210 | 53/3825  | CCNG1, CDK1, GADD45A, BID, CCNB1, CCND1, GADD45B, CCNE1, CCNE2, MDM2, CDKN1A, CASP3, RRM2, CCNB2, SESN3, PIDD                            |
| HC/1x | KEGG    | PROGESTERONE_MEDIATED_OOCYTE_MATURATION   | 0,007 | up   | 12/210 | 72/3825  | CDK1, RAF1, KRAS, CCNB1, MAPK1, MAD2L2, MAD2L1, CCNA2, CDC27, BUB1, CCNB2, PKMYT1                                                        |
| HC/1x | KEGG    | PURINE_METABOLISM                         | 0,021 | up   | 16/210 | 128/3825 | PPAT, ATIC, POLD1, RRM1, POLD2, POLR1E, ADSL, ENTPD5, POLR3G, DCK, POLD3, POLA2, PRIM1, IMPDH2, RRM2, POLE2                              |
| HC/1x | KEGG    | PYRIMIDINE_METABOLISM                     | 0,000 | up   | 21/210 | 79/3825  | TYMS, POLD1, RRM1, TK1, POLD2, POLR1E, CDA, ENTPD5, POLR3G, DTYMK, CMPK2, DCK, POLD3, TXNRD1, POLA2, DUT, PRIM1, RRM2, UMPS, CTPS, POLE2 |
| HC/1x | KEGG    | BUTANOATE_METABOLISM                      | 0,016 | down | 7/197  | 29/3825  | ACAT1, HMGCS1, AACS, EHHADH, ACSM2A, BDH2, ALDH1B1                                                                                       |
| HC/1x | KEGG    | COMPLEMENT_AND_COAGULATION_CASCADES       | 0,000 | down | 16/197 | 61/3825  | A2M, TFPI, PLG, C9, CPB2, C4BPA, F10, FGA, F5, C5, PROC, CFH, C1S, CFB, MASP1, F12                                                       |
| HC/1x | KEGG    | PROPANOATE_METABOLISM                     | 0,001 | down | 9/197  | 29/3825  | ACADM, ACAT1, EHHADH, ACACA, PCCA, SUCLG2, ACSS2, MUT, ALDH1B1                                                                           |
| HC/1x | KEGG    | TERPENOID_BACKBONE_BIOSYNTHESIS           | 0,001 | down | 6/197  | 12/3825  | FDPS, ACAT1, HMGCS1, MVD, IDI1, PDSS2                                                                                                    |
| HC/1x | KEGG    | VALINE_LEUCINE_AND_ISOLEUCINE_DEGRADATION | 0,001 | down | 10/197 | 40/3825  | ACADM, ACAT1, HMGCS1, EHHADH, ACADSB, BCKDHB, PCCA, MCCC2, MUT, ALDH1B1                                                                  |
| HC/1x | BIOARTA | CELLCYCLE_PATHWAY                         | 0,001 | up   | 9/85   | 22/1118  | CDK1, CDKN2C, CCNB1, CCND1, CCNE1, RBL1, E2F1, CDKN1A, CDKN2D                                                                            |

|       |              |                                                              |       |      |         |          |                                                                                                                                                                                                                                                                 |
|-------|--------------|--------------------------------------------------------------|-------|------|---------|----------|-----------------------------------------------------------------------------------------------------------------------------------------------------------------------------------------------------------------------------------------------------------------|
| HC/1x | BIOCA<br>RTA | G2_PATHWAY                                                   | 0,004 | up   | 8/85    | 21/1118  | YWHAH, CDK1, GADD45A, CCNB1, WEE1, MDM2, CDKN1A, CDKN2D                                                                                                                                                                                                         |
| HC/1x | BIOCA<br>RTA | MCM_PATHWAY                                                  | 0,000 | up   | 10/85   | 17/1118  | MCM6, MCM3, CCNE1, MCM4, MCM2, MCM5, ORC6, CDT1, ORC1, MCM7                                                                                                                                                                                                     |
| HC/1x | BIOCA<br>RTA | P53_PATHWAY                                                  | 0,002 | up   | 7/85    | 14/1118  | PCNA, GADD45A, CCND1, CCNE1, E2F1, MDM2, CDKN1A                                                                                                                                                                                                                 |
| HC/1x | BIOCA<br>RTA | EXTRINSIC_PATHWAY                                            | 0,025 | down | 5/62    | 12/1118  | TFPI, F10, FGA, F5, PROC                                                                                                                                                                                                                                        |
| HC/1x | BIOCA<br>RTA | INTRINSIC_PATHWAY                                            | 0,025 | down | 6/62    | 19/1118  | F10, FGA, F5, COL4A5, PROC, F12                                                                                                                                                                                                                                 |
| HC/1x | REACT<br>OME | ACTIVATION_OF_ATR_I<br>N_RESPONSE_TO_REP<br>PLICATION_STRESS | 0,000 | up   | 17/267  | 29/4186  | RFC2, MCM6, MCM3, MCM4, MCM2, MCM5, ORC6, RAD1, CDC45, MCM8, RFC5, RAD17, ORC1, RPA2, RFC4, MCM7, RFC3                                                                                                                                                          |
| HC/1x | REACT<br>OME | CELL_CYCLE                                                   | 0,000 | up   | 106/267 | 309/4186 | PCNA, CDK1, PTTG1, PPP2CB, FEN1, LMNA, LIG1, AURKB, MYC, CENPI, TYMS, CDKN2C, POLD1, CDC20, CCNB1, WEE1, MAPRE1, ZWINT, TUBG1, RFC2, MCM6, CCND1, NHP2, PSMD13, CDCA8, PSMD5, MCM3, HJURP, LIN37, CCNE1, MCM4, KIF20A, LMNB1, POLD2, MCM2, CCNE2, XPO1, KIF2C,  |
| HC/1x | REACT<br>OME | CELL_CYCLE_CHECKP<br>OINTS                                   | 0,000 | up   | 33/267  | 99/4186  | CDK1, CDC20, CCNB1, WEE1, RFC2, MCM6, PSMD13, PSMD5, MCM3, CCNE1, MCM4, MCM2, CCNE2, MCM5, ORC6, MAD2L1, RAD1, CDC45, MCM8, RFC5, CDC27, MDM2, PSMD14, BUB1B, RAD17, ORC1, CDKN1A, RPA2, RFC4, UBE2C, MCM7, RFC3, CCNB2                                         |
| HC/1x | REACT<br>OME | CELL_CYCLE_MITOTIC                                           | 0,000 | up   | 95/267  | 266/4186 | PCNA, CDK1, PTTG1, PPP2CB, FEN1, LIG1, AURKB, MYC, CENPI, TYMS, CDKN2C, POLD1, CDC20, CCNB1, WEE1, MAPRE1, ZWINT, TUBG1, RFC2, MCM6, CCND1, PSMD13, CDCA8, PSMD5, MCM3, LIN37, CCNE1, MCM4, KIF20A, POLD2, MCM2, CCNE2, XPO1, KIF2C, CENPT, AURKA, MCM5, GINS1, |
| HC/1x | REACT<br>OME | CHROMOSOME_MAINT<br>ENANCE                                   | 0,000 | up   | 28/267  | 69/4186  | PCNA, FEN1, LMNA, LIG1, CENPI, POLD1, RFC2, NHP2, HJURP,                                                                                                                                                                                                        |



|       |          |                        |       |    |        |          |                                                                                                                                                                                                                                                                 |
|-------|----------|------------------------|-------|----|--------|----------|-----------------------------------------------------------------------------------------------------------------------------------------------------------------------------------------------------------------------------------------------------------------|
|       |          |                        |       |    |        |          | LMNB1, POLD2, TINF2, RFC5, CENPK, POLD3, POLA2, RPA2, PRIM1, RFC4, RFC3, H2AFX, CENPQ, CENPN, MLF1IP, POLE2, CASC5, MIS18A, RBBP7                                                                                                                               |
| HC/1x | REACTOME | DNA_REPLICATION        | 0,000 | up | 68/267 | 165/4186 | PCNA, PPP2CB, FEN1, LIG1, AURKB, CENPI, POLD1, CDC20, MAPRE1, ZWINT, RFC2, MCM6, PSMD13, CDCA8, PSMD5, MCM3, MCM4, KIF20A, POLD2, MCM2, XPO1, KIF2C, CENPT, MCM5, GINS1, ORC6, MAD2L1, CDT1, GMNN, CDC45, CCNA2, MCM8, RFC5, CENPK, E2F1, DSN1, PSMD14, BUB1B,  |
| HC/1x | REACTOME | DNA_STRAND_ELONGATION  | 0,000 | up | 23/267 | 29/4186  | PCNA, FEN1, LIG1, POLD1, RFC2, MCM6, MCM3, MCM4, POLD2, MCM2, MCM5, GINS1, CDC45, MCM8, RFC5, POLD3, POLA2, RPA2, PRIM1, RFC4, MCM7, GINS4, RFC3                                                                                                                |
| HC/1x | REACTOME | G1_S_TRANSITION        | 0,000 | up | 34/267 | 97/4186  | PCNA, CDK1, PPP2CB, MYC, TYMS, CCNB1, WEE1, MCM6, PSMD13, PSMD5, MCM3, CCNE1, MCM4, MCM2, CCNE2, MCM5, ORC6, CDT1, CDC45, CCNA2, MCM8, E2F1, PSMD14, FBXO5, ORC1, CDKN1A, POLA2, RPA2, PRIM1, MCM7, RRM2, SKP2, PKMYT1, POLE2                                   |
| HC/1x | REACTOME | G2_M_CHECKPOINTS       | 0,000 | up | 21/267 | 34/4186  | CDK1, CCNB1, WEE1, RFC2, MCM6, MCM3, MCM4, MCM2, MCM5, ORC6, RAD1, CDC45, MCM8, RFC5, RAD17, ORC1, RPA2, RFC4, MCM7, RFC3, CCNB2                                                                                                                                |
| HC/1x | REACTOME | MITOTIC_G1_G1_S_PHASES | 0,000 | up | 41/267 | 118/4186 | PCNA, CDK1, PPP2CB, MYC, TYMS, CDKN2C, CCNB1, WEE1, MCM6, CCND1, PSMD13, PSMD5, MCM3, LIN37, CCNE1, MCM4, MCM2, CCNE2, MCM5, ORC6, CDT1, CDC45, CCNA2, RBL1, MCM8, E2F1, PSMD14, FBXO5, ORC1, LIN9, CDKN1A, POLA2, RPA2, E2F5, PRIM1, MCM7, RRM2, SKP2, PKMYT1, |
| HC/1x | REACTOME | MITOTIC_M_M_G1_PHASES  | 0,000 | up | 54/267 | 146/4186 | PPP2CB, AURKB, CENPI, CDC20, MAPRE1, ZWINT, MCM6, PSMD13, CDCA8, PSMD5, MCM3, MCM4,                                                                                                                                                                             |

|       |          |                                           |       |      |        |          |                                                                                                                                                                                                                                                       |
|-------|----------|-------------------------------------------|-------|------|--------|----------|-------------------------------------------------------------------------------------------------------------------------------------------------------------------------------------------------------------------------------------------------------|
|       |          |                                           |       |      |        |          | KIF20A, MCM2, XPO1, KIF2C, CENPT, MCM5, ORC6, MAD2L1, CDT1, GMNN, CDC45, MCM8, CENPK, E2F1, DSN1, PSMD14, BUB1B, NUF2, FBXO5, BUB1, ZWILCH, ORC1, ERCC6L, NUP107, POLA2, RP                                                                           |
| HC/1x | REACTOME | MITOTIC_PROMETAPHASE                      | 0,000 | up   | 31/267 | 74/4186  | PPP2CB, AURKB, CENPI, CDC20, MAPRE1, ZWINT, CDCA8, XPO1, KIF2C, CENPT, MAD2L1, CENPK, DSN1, BUB1B, NUF2, BUB1, ZWILCH, ERCC6L, NUP107, CKAP5, NUP43, SPC25, NUP85, SKA1, KIF18A, CENPQ, CENPN, MLF1IP, CLIP1, CASC5, CENPL                            |
| HC/1x | REACTOME | S_PHASE                                   | 0,000 | up   | 38/267 | 100/4186 | PCNA, FEN1, LIG1, MYC, POLD1, WEE1, RFC2, MCM6, CCND1, PSMD13, PSMD5, MCM3, CCNE1, MCM4, POLD2, MCM2, CCNE2, MCM5, GINS1, ORC6, CDT1, CDC45, CCNA2, MCM8, RFC5, PSMD14, POLD3, ORC1, CDKN1A, POLA2, RPA2, PRIM1, RFC4, MCM7, GINS4, RFC3, SKP2, POLE2 |
| HC/1x | REACTOME | SYNTHESIS_OF_DNA                          | 0,000 | up   | 32/267 | 84/4186  | PCNA, FEN1, LIG1, POLD1, RFC2, MCM6, PSMD13, PSMD5, MCM3, MCM4, POLD2, MCM2, MCM5, GINS1, ORC6, CDT1, CDC45, CCNA2, MCM8, RFC5, PSMD14, POLD3, ORC1, CDKN1A, POLA2, RPA2, PRIM1, RFC4, MCM7, GINS4, RFC3, POLE2                                       |
| HC/1x | REACTOME | UNWINDING_OF_DNA                          | 0,000 | up   | 10/267 | 10/4186  | MCM6, MCM3, MCM4, MCM2, MCM5, GINS1, CDC45, MCM8, MCM7, GINS4                                                                                                                                                                                         |
| HC/1x | REACTOME | ALPHA_LINOLENIC_ACID_ALA_METABOLISM       | 0,013 | down | 5/208  | 10/4186  | HSD17B4, FADS1, FADS2, ACSL1, ELOVL5                                                                                                                                                                                                                  |
| HC/1x | REACTOME | CHOLESTEROL_BIOSYNTHESIS                  | 0,001 | down | 8/208  | 19/4186  | FDPS, FDFT1, HMGCS1, MVD, MSMO1, LSS, IDI1, TM7SF2                                                                                                                                                                                                    |
| HC/1x | REACTOME | COMPLEMENT_CASCADE                        | 0,019 | down | 7/208  | 25/4186  | C9, C4BPA, C5, CFH, C1S, CFB, MASP1                                                                                                                                                                                                                   |
| HC/1x | REACTOME | FORMATION_OF_FIBRIN_CLOT_CLOTTING_CASCADE | 0,019 | down | 7/208  | 25/4186  | A2M, TFPI, F10, FGA, F5, PROC, F12                                                                                                                                                                                                                    |

|       |          |                                                     |       |      |        |          |                                                                                                                                                                                                                                                                  |
|-------|----------|-----------------------------------------------------|-------|------|--------|----------|------------------------------------------------------------------------------------------------------------------------------------------------------------------------------------------------------------------------------------------------------------------|
| HC/1x | REACTOME | METABOLISM_OF_AMINO_ACIDS_AND_DERIVATIVES           | 0,019 | down | 21/208 | 179/4186 | CDO1, ACAT1, CTH, DDC, KMO, INHBA, DIO1, ACADSB, BBOX1, OTC, CPS1, BCKDHB, ASS1, MAT1A, PRODH, MCCC2, AASS, GPT2, GPT, AADAT, SLC25A21                                                                                                                           |
| HC/1x | REACTOME | METABOLISM_OF_LIPIDS_AND_LIPOPROTEINS               | 0,000 | down | 51/208 | 412/4186 | FDPS, HSD17B4, ACADM, FASN, ACAT1, AMACR, A2M, FDFT1, ACLY, FADS1, HMGCS1, LRP2, MVD, MSMO1, GC, STS, CROT, FADS2, LRAT, SLC10A1, SMPD3, PIK3C2G, LIPC, PI4KA, PLD1, ACACA, SLC44A1, ACSL1, HAACL1, ACOX2, GLB1, PCCA, HEXB, LSS, PLBD1, MTMR7, PPM1L, MUT, NPAS |
| HC/1x | REACTOME | METABOLISM_OF_STEROID_HORMONES_AND_VITAMINS_A_AND_D | 0,496 | down | 5/208  | 28/4186  | LRP2, GC, LRAT, CYP17A1, STARD4                                                                                                                                                                                                                                  |
| HC/6x | KEGG     | GLUTATHIONE_METABOLISM                              | 0,000 | up   | 20/313 | 42/3825  | G6PD, GGT1, GSR, GSTM3, GPX3, GCLM, GSS, GCLC, GSTM5, GSTM2, GSTA5, RRM1, GPX7, MGST2, GPX2, SMS, GSTM4, GSTM1, GSTP1, RRM2                                                                                                                                      |
| HC/6x | KEGG     | CELL_CYCLE                                          | 0,000 | up   | 31/313 | 110/3825 | PCNA, YWHAH, CDK1, PTTG1, CDKN2C, YWHAQ, CDC20, PLK1, CCNB1, WEE1, MCM6, CDKN1C, CCNE1, MCM4, MCM2, CCNE2, MCM5, ESPL1, ORC6, MAD2L1, TTK, CCNA2, RBL1, CCND1, MDM2, BUB1B, BUB1, YWHAG, CDKN1A, MCM7, CCNB2                                                     |
| HC/6x | KEGG     | METABOLISM_OF_XENOBIOTICS_BY_CYTOCHROME_P450        | 0,000 | up   | 14/313 | 34/3825  | UGT2A1, GSTM3, CYP1A1, UGT2B7, GSTM5, GSTM2, GSTA5, MGST2, GSTM4, GSTM1, EPHX1, AKR1C3, GSTP1, ALDH3B1                                                                                                                                                           |
| HC/6x | KEGG     | P53_SIGNALING_PATHWAY                               | 0,000 | up   | 17/313 | 53/3825  | CCNG1, CDK1, APAF1, BID, CCNB1, PERP, CCNE1, CCNE2, CCND1, MDM2, FAS, ZMAT3, CDKN1A, CASP3, RRM2, CCNB2, SESN3                                                                                                                                                   |
| HC/6x | KEGG     | DNA_REPLICATION                                     | 0,000 | up   | 13/313 | 33/3825  | PCNA, FEN1, MCM6, RNASEH2A, MCM4, MCM2, MCM5, RPA2, RFC4, MCM7, PRIM2, RFC3, POLE2                                                                                                                                                                               |
| HC/6x | KEGG     | DRUG_METABOLISM_CYTOCHROME_P450                     | 0,003 | up   | 11/313 | 36/3825  | UGT2A1, GSTM3, UGT2B7, GSTM5, GSTM2, GSTA5, MGST2, GSTM4, GSTM1, GSTP1, ALDH3B1                                                                                                                                                                                  |

|       |          |                        |       |      |        |          |                                                                                                                                                                                                                                                                |
|-------|----------|------------------------|-------|------|--------|----------|----------------------------------------------------------------------------------------------------------------------------------------------------------------------------------------------------------------------------------------------------------------|
| HC/6x | KEGG     | PYRIMIDINE_METABOLISM  | 0,013 | up   | 16/313 | 79/3825  | TYMS, RRM1, TK1, CDA, DCTD, ENTPD5, POLR3G, CMPK2, DCK, TXNRD1, DUT, PRIM2, RRM2, UMPS, CTPS, POLE2                                                                                                                                                            |
| HC/6x | KEGG     | VIRAL_MYOCARDITIS      | 0,020 | up   | 10/313 | 39/3825  | BID, MYH10, SGCA, RAC2, SGCB, CCND1, MYH14, CXADR, ICAM1, CASP3                                                                                                                                                                                                |
| HC/6x | KEGG     | STEROID_BIOSYNTHESIS   | 0,000 | down | 7/167  | 14/3825  | MSMO1, LSS, EBP, HSD17B7, SC5DL, TM7SF2, NSDHL                                                                                                                                                                                                                 |
| HC/6x | KEGG     | PPAR_SIGNALING_PATHWAY | 0,001 | down | 12/167 | 60/3825  | EHHADH, CYP8B1, FADS2, CYP7A1, FABP1, FABP7, ACSL1, RXRG, CD36, ACSL5, SLC27A5, ANGPTL4                                                                                                                                                                        |
| HC/6x | KEGG     | PYRUVATE_METABOLISM    | 0,047 | down | 7/167  | 36/3825  | PKLR, ALDH7A1, MDH1, ACSS2, PC, ACYP2, ME3                                                                                                                                                                                                                     |
| HC/6x | BIOARTA  | MCM_PATHWAY            | 0,001 | up   | 9/101  | 17/1118  | MCM6, CCNE1, MCM4, MCM2, MCM5, ORC6, CDT1, MCM7, KITLG                                                                                                                                                                                                         |
| HC/6x | BIOARTA  | G2_PATHWAY             | 0,028 | up   | 8/101  | 21/1118  | YWHAH, CDK1, YWHAQ, PLK1, CCNB1, WEE1, MDM2, CDKN1A                                                                                                                                                                                                            |
| HC/6x | REACTOME | CELL_CYCLE             | 0,000 | up   | 75/335 | 309/4186 | PCNA, CDK1, PTTG1, FEN1, CLIP1, LMNA, AURKB, CENPI, BIRC5, TYMS, CDKN2C, CDC20, PLK1, CCNB1, WEE1, MAPRE1, MCM6, SEC13, NHP2, CDCA8, HJURP, CCNE1, MCM4, KIF20A, LMNB1, MCM2, CCNE2, KIF2C, NUP133, AURKA, MCM5, ORC6, CKS1B, MAD2L1, KNTC1, PLK4, CDT1, GMNN, |
| HC/6x | REACTOME | CELL_CYCLE_MITOTIC     | 0,000 | up   | 68/335 | 266/4186 | PCNA, CDK1, PTTG1, FEN1, CLIP1, AURKB, CENPI, BIRC5, TYMS, CDKN2C, CDC20, PLK1, CCNB1, WEE1, MAPRE1, MCM6, SEC13, CDCA8, CCNE1, MCM4, KIF20A, MCM2, CCNE2, KIF2C, NUP133, AURKA, MCM5, ORC6, CKS1B, MAD2L1, KNTC1, PLK4, CDT1, GMNN, CCNA2, RBL1, MCM8, CENPK, |
| HC/6x | REACTOME | DNA_REPLICATION        | 0,000 | up   | 48/335 | 165/4186 | PCNA, FEN1, CLIP1, AURKB, CENPI, BIRC5, CDC20, PLK1, MAPRE1, MCM6, SEC13, CDCA8, MCM4, KIF20A, MCM2, KIF2C, NUP133, MCM5, ORC6, MAD2L1, KNTC1, CDT1, GMNN, CCNA2, MCM8, CENPK, KIF2A, DSN1,                                                                    |

|       |          |                         |       |    |        |          |                                                                                                                                                                                                                                                                 |
|-------|----------|-------------------------|-------|----|--------|----------|-----------------------------------------------------------------------------------------------------------------------------------------------------------------------------------------------------------------------------------------------------------------|
|       |          |                         |       |    |        |          | BUB1B, NUF2, BUB1, ZWILCH, CDKN1A, RPA2, CKAP5, RFC4, MCM7, PRIM2,                                                                                                                                                                                              |
| HC/6x | REACTOME | MITOTIC_M_M_G1_PHASES   | 0,000 | up | 41/335 | 146/4186 | CLIP1, AURKB, CENPI, BIRC5, CDC20, PLK1, MAPRE1, MCM6, SEC13, CDCA8, MCM4, KIF20A, MCM2, KIF2C, NUP133, MCM5, ORC6, MAD2L1, KNTC1, CDT1, GMNN, MCM8, CENPK, KIF2A, DSN1, BUB1B, NUF2, BUB1, ZWILCH, RPA2, CKAP5, MCM7, PRIM2, SPC25, KIF23, SKA1, KIF18A, CENPQ |
| HC/6x | REACTOME | MITOTIC_PROMETAPHASE    | 0,000 | up | 27/335 | 74/4186  | CLIP1, AURKB, CENPI, BIRC5, CDC20, PLK1, MAPRE1, SEC13, CDCA8, KIF2C, NUP133, MAD2L1, KNTC1, CENPK, KIF2A, DSN1, BUB1B, NUF2, BUB1, ZWILCH, CKAP5, SPC25, SKA1, KIF18A, CENPQ, CENPN, CASC5                                                                     |
| HC/6x | REACTOME | KINESINS                | 0,000 | up | 11/335 | 20/4186  | KIF22, RACGAP1, KIF20A, KIF15, KIF2C, KIFC1, KIF4A, KIF2A, KIF11, KIF23, KIF18A                                                                                                                                                                                 |
| HC/6x | REACTOME | DNA_STRAND_ELONGATION   | 0,000 | up | 13/335 | 29/4186  | PCNA, FEN1, MCM6, MCM4, MCM2, MCM5, MCM8, RPA2, RFC4, MCM7, PRIM2, GINS4, RFC3                                                                                                                                                                                  |
| HC/6x | REACTOME | G2_M_CHECKPOINTS        | 0,000 | up | 14/335 | 34/4186  | CDK1, CCNB1, WEE1, MCM6, MCM4, MCM2, MCM5, ORC6, MCM8, RPA2, RFC4, MCM7, RFC3, CCNB2                                                                                                                                                                            |
| HC/6x | REACTOME | PHASE_II_CONJUGATION    | 0,000 | up | 16/335 | 45/4186  | UGDH, GGT1, SULT1E1, UGT2A1, GCLM, GSS, UGT2B7, GCLC, GSTM5, GSTA5, MAT2A, PAPSS1, MGST2, GSTM4, GSTM1, GSTP1                                                                                                                                                   |
| HC/6x | REACTOME | GLUTATHIONE_CONJUGATION | 0,000 | up | 10/335 | 20/4186  | GGT1, GCLM, GSS, GCLC, GSTM5, GSTA5, MGST2, GSTM4, GSTM1, GSTP1                                                                                                                                                                                                 |
| HC/6x | REACTOME | MITOTIC_G1_G1_S_PHASES  | 0,000 | up | 26/335 | 118/4186 | PCNA, CDK1, TYMS, CDKN2C, CCNB1, WEE1, MCM6, CCNE1, MCM4, MCM2, CCNE2, MCM5, ORC6, CKS1B, CDT1, CCNA2, RBL1, MCM8, CCND1, LIN9, CDKN1A, RPA2, MCM7, PRIM2, RRM2, POLE2                                                                                          |

|       |          |                                                                       |       |      |        |          |                                                                                                                                                                                                                                                                |
|-------|----------|-----------------------------------------------------------------------|-------|------|--------|----------|----------------------------------------------------------------------------------------------------------------------------------------------------------------------------------------------------------------------------------------------------------------|
| HC/6x | REACTOME | ACTIVATION_OF_THE_PRE_REPLICATIVE_COMPLEX                             | 0,000 | up   | 11/335 | 26/4186  | MCM6, MCM4, MCM2, MCM5, ORC6, CDT1, MCM8, RPA2, MCM7, PRIM2, POLE2                                                                                                                                                                                             |
| HC/6x | REACTOME | UNWINDING_OF_DNA                                                      | 0,000 | up   | 7/335  | 10/4186  | MCM6, MCM4, MCM2, MCM5, MCM8, MCM7, GINS4                                                                                                                                                                                                                      |
| HC/6x | REACTOME | S_PHASE                                                               | 0,000 | up   | 23/335 | 100/4186 | PCNA, FEN1, WEE1, MCM6, CCNE1, MCM4, MCM2, CCNE2, MCM5, ORC6, CKS1B, CDT1, CCNA2, MCM8, CCND1, CDKN1A, RPA2, RFC4, MCM7, PRIM2, GINS4, RFC3, POLE2                                                                                                             |
| HC/6x | REACTOME | CHROMOSOME_MAINTENANCE                                                | 0,000 | up   | 18/335 | 69/4186  | PCNA, FEN1, LMNA, CENPI, NHP2, HJURP, LMNB1, CENPK, H2AFZ, RPA2, RFC4, PRIM2, RFC3, CENPQ, CENPN, POLE2, CASC5, MIS18A                                                                                                                                         |
| HC/6x | REACTOME | METABOLISM_OF_LIPIDS_AND_LIPOPROTEINS                                 | 0,000 | down | 47/165 | 412/4186 | FDPS, FASN, AMACR, ACLY, FADS1, MVD, MSMO1, STS, CYP8B1, FADS2, CYP7A1, SLC10A1, ABCB11, IDI1, PIK3C2G, FABP1, PEMT, LIPC, SLCO1B3, PIK3R1, SRD5A1, NR1D1, ACSL1, PPAP2B, HACL1, SREBF1, DGAT2, LSS, PLBD1, PMVK, MTMR7, MED4, CRLS1, MUT, NPAS2, CD36, ACSL5, |
| HC/6x | REACTOME | CHOLESTEROL_BIOSYNTHESIS                                              | 0,000 | down | 11/165 | 19/4186  | FDPS, MVD, MSMO1, IDI1, LSS, PMVK, EBP, HSD17B7, SC5DL, TM7SF2, NSDHL                                                                                                                                                                                          |
| HC/6x | REACTOME | METABOLISM_OF_AMINO_ACIDS_AND_DERIVATIVES                             | 0,004 | down | 20/165 | 179/4186 | OAT, HPD, ASL, BBOX1, TAT, SUOX, GLS2, ALDH7A1, PRODH, MCCC1, AASS, PAH, GPT, CBS, AADAT, HAL, SLC25A21, FTCD, GSTZ1, KYNU                                                                                                                                     |
| HC/6x | REACTOME | BILE_ACID_AND_BILE_SALT_METABOLISM                                    | 0,006 | down | 7/165  | 25/4186  | AMACR, CYP8B1, CYP7A1, SLC10A1, ABCB11, SLCO1B3, SLC27A5                                                                                                                                                                                                       |
| HC/6x | REACTOME | PHASE1_FUNCTIONALIZATION_OF_COMPOUNDS                                 | 0,008 | down | 8/165  | 36/4186  | CYP2E1, CYP8B1, CYP7A1, PTGIS, ACSS2, FMO1, CYP1A2, CYP26A1                                                                                                                                                                                                    |
| HC/6x | REACTOME | SYNTHESIS_OF_BILE_ACIDS_AND_BILE_SALT_S_VIA_7ALPHA_HYDROXYCHOLESTEROL | 0,014 | down | 5/165  | 14/4186  | AMACR, CYP8B1, CYP7A1, ABCB11, SLC27A5                                                                                                                                                                                                                         |

|       |          |                                                       |       |      |        |          |                                                                                                               |
|-------|----------|-------------------------------------------------------|-------|------|--------|----------|---------------------------------------------------------------------------------------------------------------|
| HC/6x | REACTOME | CYTOCHROME_P450_ARRANGED_BY_SUBSTRATE_TYPE            | 0,014 | down | 6/165  | 22/4186  | CYP2E1, CYP8B1, CYP7A1, PTGIS, CYP1A2, CYP26A1                                                                |
| HC/6x | REACTOME | FATTY_ACYL_COA_BIOSYNTHESIS                           | 0,016 | down | 5/165  | 15/4186  | FASN, ACLY, ACSL1, ACSL5, ELOVL5                                                                              |
| HC/6x | REACTOME | FATTY_ACID_TRIACYLGLYCEROL_AND_KETONE_BODY_METABOLISM | 0,019 | down | 16/165 | 152/4186 | FASN, ACLY, FADS1, CYP7A1, FABP1, NR1D1, ACSL1, SREBF1, DGAT2, MED4, MUT, NPAS2, CD36, ACSL5, ELOVL5, ANGPTL4 |
| HC/6x | REACTOME | RECYCLING_OF_BILEACIDS_AND_SALTS                      | 0,025 | down | 4/165  | 10/4186  | SLC10A1, ABCB11, SLCO1B3, SLC27A5                                                                             |
| HC/6x | REACTOME | ALPHA_LINOLENIC_ACID_ALA_METABOLISM                   | 0,025 | down | 4/165  | 10/4186  | FADS1, FADS2, ACSL1, ELOVL5                                                                                   |
| HC/6x | REACTOME | SYNTHESIS_OF_BILEACIDS_AND_BILE_SALTS                 | 0,028 | down | 5/165  | 18/4186  | AMACR, CYP8B1, CYP7A1, ABCB11, SLC27A5                                                                        |
| HC/6x | REACTOME | REGULATION_OF_PYRUVATE_DEHYDROGENASE_PDH_COMPLEX      | 0,032 | down | 4/165  | 11/4186  | PDK2, PDK1, PDK4, PDP2                                                                                        |
| MC/1x | KEGG     | ASCORBATE_AND_ALDARATE_METABOLISM                     | 0,005 | up   | 4/92   | 12/3825  | UGDH, UGT2B15, UGT2A1, UGT2B17                                                                                |
| MC/1x | KEGG     | CELL_CYCLE                                            | 0,027 | up   | 9/92   | 110/3825 | CDK1, CCNB1, CCNE1, CCNE2, ORC6, CCNA2, MDM2, CHEK1, CDKN1A                                                   |
| MC/1x | KEGG     | P53_SIGNALING_PATHWAY                                 | 0,000 | up   | 9/92   | 53/3825  | CDK1, CCNB1, CCNE1, CCNE2, MDM2, CHEK1, CDKN1A, PERP, RRM2                                                    |
| MC/1x | KEGG     | PENTOSE_AND_GLUCONATE_INTERCONVERSIONS                | 0,006 | up   | 4/92   | 13/3825  | UGDH, UGT2B15, UGT2A1, UGT2B17                                                                                |
| MC/1x | KEGG     | PORPHYRIN_AND_CHLOROPHYLL_METABOLISM                  | 0,036 | up   | 4/92   | 23/3825  | ALAS1, UGT2B15, UGT2A1, UGT2B17                                                                               |
| MC/1x | KEGG     | PYRIMIDINE_METABOLISM                                 | 0,044 | up   | 7/92   | 79/3825  | TYMS, POLD2, CDA, ENTPD5, TXNRD1, RRM2, CTPS                                                                  |
| MC/1x | KEGG     | RETINOL_METABOLISM                                    | 0,008 | up   | 5/92   | 26/3825  | UGT2B15, UGT2A1, DHRS4, ALDH1A1, UGT2B17                                                                      |
| MC/1x | KEGG     | BETA_ALANINE_METABOLISM                               | 0,001 | down | 4/21   | 21/3825  | DPYD, EHHADH, GAD1, ALDH1B1                                                                                   |
| MC/1x | KEGG     | BUTANOATE_METABOLISM                                  | 0,029 | down | 3/21   | 29/3825  | EHHADH, GAD1, ALDH1B1                                                                                         |

|       |          |                                            |       |      |        |          |                                                                                                                                                                          |
|-------|----------|--------------------------------------------|-------|------|--------|----------|--------------------------------------------------------------------------------------------------------------------------------------------------------------------------|
| MC/1x | KEGG     | LIMONENE_AND_PINENE_DEGRADATION            | 0,031 | down | 2/21   | 8/3825   | EHHADH, ALDH1B1                                                                                                                                                          |
| MC/1x | KEGG     | LYSINE_DEGRADATION                         | 0,031 | down | 3/21   | 37/3825  | EHHADH, BBOX1, ALDH1B1                                                                                                                                                   |
| MC/1x | KEGG     | RETINOL_METABOLISM                         | 0,029 | down | 3/21   | 26/3825  | LRAT, CYP26B1, CYP26A1                                                                                                                                                   |
| MC/1x | KEGG     | TAURINE_AND_HYPOTHAURINE_METABOLISM        | 0,031 | down | 2/21   | 9/3825   | CDO1, GAD1                                                                                                                                                               |
| MC/1x | BIOCARTA | G2_PATHWAY                                 | 0,016 | up   | 5/26   | 21/1118  | CDK1, CCNB1, MDM2, CHEK1, CDKN1A                                                                                                                                         |
| MC/1x | REACTOME | BIOLOGICAL_OXIDATIONS                      | 0,000 | up   | 12/107 | 80/4186  | UGDH, CYP8B1, UGT2A1, GSS, GCLC, GSTA5, MGST2, GSTM4, GSTM1, ALDH1A1, SULT1B1, UGT2B17                                                                                   |
| MC/1x | REACTOME | CELL_CYCLE                                 | 0,000 | up   | 25/107 | 309/4186 | CDK1, AURKB, TYMS, CCNB1, ZWINT, CKS1B, TUBA4A, CCNE1, POLD2, CCNE2, GINS1, ORC6, CDT1, CCNA2, CENPK, MDM2, CHEK1, CDKN1A, RFC4, UBE2C, RRM2, PSMD8, SPC25, SKA1, MIS18A |
| MC/1x | REACTOME | CELL_CYCLE_CHECKPOINTS                     | 0,002 | up   | 11/107 | 99/4186  | CDK1, CCNB1, CCNE1, CCNE2, ORC6, MDM2, CHEK1, CDKN1A, RFC4, UBE2C, PSMD8                                                                                                 |
| MC/1x | REACTOME | CELL_CYCLE_MITOTIC                         | 0,000 | up   | 22/107 | 266/4186 | CDK1, AURKB, TYMS, CCNB1, ZWINT, CKS1B, TUBA4A, CCNE1, POLD2, CCNE2, GINS1, ORC6, CDT1, CCNA2, CENPK, CDKN1A, RFC4, UBE2C, RRM2, PSMD8, SPC25, SKA1                      |
| MC/1x | REACTOME | CHYLOMICRON_MEDIATED_LIPID_TRANSPORT       | 0,002 | up   | 5/107  | 15/4186  | SDC1, APOA1, APOA2, APOB, MTPP                                                                                                                                           |
| MC/1x | REACTOME | DNA_REPLICATION                            | 0,011 | up   | 13/107 | 165/4186 | AURKB, ZWINT, POLD2, GINS1, ORC6, CDT1, CCNA2, CENPK, CDKN1A, RFC4, PSMD8, SPC25, SKA1                                                                                   |
| MC/1x | REACTOME | E2F_MEDIATED_REGULATION_OF_DNA_REPLICATION | 0,001 | up   | 7/107  | 30/4186  | CDK1, TYMS, CCNB1, CCNE1, ORC6, CDT1, RRM2                                                                                                                               |
| MC/1x | REACTOME | G1_S_SPECIFIC_TRANSCRIPTION                | 0,002 | up   | 5/107  | 15/4186  | CDK1, TYMS, CCNE1, CDT1, RRM2                                                                                                                                            |
| MC/1x | REACTOME | G1_S_TRANSITION                            | 0,001 | up   | 12/107 | 97/4186  | CDK1, TYMS, CCNB1, CKS1B, CCNE1, CCNE2, ORC6, CDT1, CCNA2, CDKN1A, RRM2, PSMD8                                                                                           |



|       |          |                                            |       |      |        |          |                                                                                                                                                                                        |
|-------|----------|--------------------------------------------|-------|------|--------|----------|----------------------------------------------------------------------------------------------------------------------------------------------------------------------------------------|
| MC/1x | REACTOME | LIPID_DIGESTION_MOBILIZATION_AND_TRANSPORT | 0,003 | up   | 7/107  | 41/4186  | SDC1, LCAT, APOA1, ABCG5, APOA2, APOB, MTPP                                                                                                                                            |
| MC/1x | REACTOME | LIPOPROTEIN_METABOLISM                     | 0,002 | up   | 6/107  | 25/4186  | SDC1, LCAT, APOA1, APOA2, APOB, MTPP                                                                                                                                                   |
| MC/1x | REACTOME | MITOTIC_G1_G1_S_PHASES                     | 0,002 | up   | 12/107 | 118/4186 | CDK1, TYMS, CCNB1, CKS1B, CCNE1, CCNE2, ORC6, CDT1, CCNA2, CDKN1A, RRM2, PSMD8                                                                                                         |
| MC/1x | REACTOME | S_PHASE                                    | 0,002 | up   | 11/107 | 100/4186 | CKS1B, CCNE1, POLD2, CCNE2, GINS1, ORC6, CDT1, CCNA2, CDKN1A, RFC4, PSMD8                                                                                                              |
| MC/1x | REACTOME | BIOLOGICAL_OXIDATIONS                      | 0,002 | down | 6/22   | 80/4186  | PTGIS, SULT1A1, MAT1A, CYP26B1, FMO1, CYP26A1                                                                                                                                          |
| MC/1x | REACTOME | CYTOCHROME_P450_ARRANGED_BY_SUBSTRATE_TYPE | 0,040 | down | 3/22   | 22/4186  | PTGIS, CYP26B1, CYP26A1                                                                                                                                                                |
| MC/1x | REACTOME | PHASE1_FUNCTIONALIZATION_OF_COMPOUNDS      | 0,010 | down | 4/22   | 36/4186  | PTGIS, CYP26B1, FMO1, CYP26A1                                                                                                                                                          |
| MC/6x | KEGG     | CELL_CYCLE                                 | 0,000 | up   | 28/120 | 110/3825 | CDK1, PTTG1, MYC, CDKN2C, CDC20, PLK1, CCNB1, MCM6, CCNE1, MCM4, MCM2, CCNE2, MCM5, ESPL1, ORC6, MAD2L1, CDC45, TTK, CCNA2, E2F1, BUB1B, MDM2, CDKN2D, BUB1, CDKN1A, MCM7, CCNB2, SKP2 |
| MC/6x | KEGG     | DNA_REPLICATION                            | 0,000 | up   | 8/120  | 33/3825  | FEN1, MCM6, MCM4, MCM2, MCM5, MCM7, PRIM2, POLE2                                                                                                                                       |
| MC/6x | KEGG     | P53_SIGNALING_PATHWAY                      | 0,001 | up   | 9/120  | 53/3825  | CDK1, CCNB1, PERP, CCNE1, CCNE2, MDM2, CDKN1A, RRM2, CCNB2                                                                                                                             |
| MC/6x | KEGG     | OOCYTE_MEIOSIS                             | 0,001 | up   | 12/120 | 97/3825  | CDK1, PTTG1, CDC20, PLK1, CCNB1, CCNE1, CCNE2, AURKA, ESPL1, MAD2L1, BUB1, CCNB2                                                                                                       |
| MC/6x | KEGG     | RETINOL_METABOLISM                         | 0,003 | up   | 6/120  | 26/3825  | ADH1C, UGT2B15, CYP1A1, CYP26B1, ALDH1A1, UGT2B17                                                                                                                                      |
| MC/6x | KEGG     | STEROID_HORMONE_BIOSYNTHESIS               | 0,007 | up   | 6/120  | 31/3825  | UGT2B15, CYP1A1, HSD11B1, UGT2B17, AKR1C3, AKR1D1                                                                                                                                      |
| MC/6x | KEGG     | SMALL_CELL_LUNG_CANCER                     | 0,007 | up   | 9/120  | 72/3825  | MYC, PTGS2, FN1, CKS1B, COL4A1, CCNE1, CCNE2, E2F1, SKP2                                                                                                                               |
| MC/6x | KEGG     | ECM_RECEPTOR_INTERACTION                   | 0,023 | up   | 8/120  | 70/3825  | SPP1, SDC1, FN1, HMMR, COL5A2, COL4A1, ITGA8, VWF                                                                                                                                      |

|       |          |                       |       |    |        |          |                                                                                                                                                                                                                                                                 |
|-------|----------|-----------------------|-------|----|--------|----------|-----------------------------------------------------------------------------------------------------------------------------------------------------------------------------------------------------------------------------------------------------------------|
| MC/6x | KEGG     | PYRIMIDINE_METABOLISM | 0,047 | up | 8/120  | 79/3825  | TYMS, RRM1, TK1, TXNRD1, PRIM2, RRM2, CTPS, POLE2                                                                                                                                                                                                               |
| MC/6x | BIOARTA  | MCM_PATHWAY           | 0,000 | up | 8/49   | 17/1118  | MCM6, CCNE1, MCM4, MCM2, MCM5, ORC6, CDT1, MCM7                                                                                                                                                                                                                 |
| MC/6x | BIOARTA  | CELLCYCLE_PATHWAY     | 0,002 | up | 7/49   | 22/1118  | CDK1, CDKN2C, CCNB1, CCNE1, E2F1, CDKN2D, CDKN1A                                                                                                                                                                                                                |
| MC/6x | BIOARTA  | G2_PATHWAY            | 0,012 | up | 6/49   | 21/1118  | CDK1, PLK1, CCNB1, MDM2, CDKN2D, CDKN1A                                                                                                                                                                                                                         |
| MC/6x | REACTOME | CELL_CYCLE            | 0,000 | up | 57/157 | 309/4186 | CDK1, PTTG1, FEN1, AURKB, MYC, BIRC5, TYMS, CDKN2C, CDC20, PLK1, CCNB1, MCM6, CKS1B, CDCA8, HJURP, CCNE1, MCM4, KIF20A, LMNB1, MCM2, CCNE2, KIF2C, AURKA, MCM5, GINS1, ORC6, MAD2L1, KNTC1, PLK4, CDT1, GMNN, CDC45, CCNA2, CENPK, E2F1, DSN1, BUB1B, NUF2, MDM |
| MC/6x | REACTOME | CELL_CYCLE_MITOTIC    | 0,000 | up | 52/157 | 266/4186 | CDK1, PTTG1, FEN1, AURKB, MYC, BIRC5, TYMS, CDKN2C, CDC20, PLK1, CCNB1, MCM6, CKS1B, CDCA8, CCNE1, MCM4, KIF20A, MCM2, CCNE2, KIF2C, AURKA, MCM5, GINS1, ORC6, MAD2L1, KNTC1, PLK4, CDT1, GMNN, CDC45, CCNA2, CENPK, E2F1, DSN1, BUB1B, NUF2, CDKN2D, BUB1, ZWI |
| MC/6x | REACTOME | DNA_REPLICATION       | 0,000 | up | 36/157 | 165/4186 | FEN1, AURKB, BIRC5, CDC20, PLK1, MCM6, CDCA8, MCM4, KIF20A, MCM2, KIF2C, MCM5, GINS1, ORC6, MAD2L1, KNTC1, CDT1, GMNN, CDC45, CCNA2, CENPK, E2F1, DSN1, BUB1B, NUF2, BUB1, ZWILCH, CDKN1A, MCM7, PRIM2, SPC25, KIF23, SKA1, CENPN, POLE2, CASC5                 |
| MC/6x | REACTOME | MITOTIC_M_M_G1_PHASES | 0,000 | up | 32/157 | 146/4186 | AURKB, BIRC5, CDC20, PLK1, MCM6, CDCA8, MCM4, KIF20A, MCM2, KIF2C, MCM5, ORC6, MAD2L1, KNTC1, CDT1, GMNN, CDC45, CENPK, E2F1, DSN1, BUB1B, NUF2, BUB1, ZWILCH, MCM7, PRIM2, SPC25, KIF23, SKA1, CENPN, POLE2, CASC5                                             |

|       |          |                                            |       |    |        |          |                                                                                                                                                             |
|-------|----------|--------------------------------------------|-------|----|--------|----------|-------------------------------------------------------------------------------------------------------------------------------------------------------------|
| MC/6x | REACTOME | G1_S_TRANSITION                            | 0,000 | up | 22/157 | 97/4186  | CDK1, MYC, TYMS, CCNB1, MCM6, CKS1B, CCNE1, MCM4, MCM2, CCNE2, MCM5, ORC6, CDT1, CDC45, CCNA2, E2F1, CDKN1A, MCM7, PRIM2, RRM2, SKP2, POLE2                 |
| MC/6x | REACTOME | MITOTIC_G1_G1_S_PHASES                     | 0,000 | up | 24/157 | 118/4186 | CDK1, MYC, TYMS, CDKN2C, CCNB1, MCM6, CKS1B, CCNE1, MCM4, MCM2, CCNE2, MCM5, ORC6, CDT1, CDC45, CCNA2, E2F1, CDKN2D, CDKN1A, MCM7, PRIM2, RRM2, SKP2, POLE2 |
| MC/6x | REACTOME | MITOTIC_PROMETAPHASE                       | 0,000 | up | 18/157 | 74/4186  | AURKB, BIRC5, CDC20, PLK1, CDCA8, KIF2C, MAD2L1, KNTC1, CENPK, DSN1, BUB1B, NUF2, BUB1, ZWILCH, SPC25, SKA1, CENPN, CASC5                                   |
| MC/6x | REACTOME | S_PHASE                                    | 0,000 | up | 19/157 | 100/4186 | FEN1, MYC, MCM6, CKS1B, CCNE1, MCM4, MCM2, CCNE2, MCM5, GINS1, ORC6, CDT1, CDC45, CCNA2, CDKN1A, MCM7, PRIM2, SKP2, POLE2                                   |
| MC/6x | REACTOME | UNWINDING_OF_DNA                           | 0,000 | up | 7/157  | 10/4186  | MCM6, MCM4, MCM2, MCM5, GINS1, CDC45, MCM7                                                                                                                  |
| MC/6x | REACTOME | ACTIVATION_OF_THE_PRE_REPLICATIVE_COMPLEX  | 0,000 | up | 10/157 | 26/4186  | MCM6, MCM4, MCM2, MCM5, ORC6, CDT1, CDC45, MCM7, PRIM2, POLE2                                                                                               |
| MC/6x | REACTOME | KINESINS                                   | 0,000 | up | 9/157  | 20/4186  | KIF22, RACGAP1, KIF20A, KIF15, KIF2C, KIFC1, KIF4A, KIF11, KIF23                                                                                            |
| MC/6x | REACTOME | CELL_CYCLE_CHECKPOINTS                     | 0,000 | up | 18/157 | 99/4186  | CDK1, CDC20, CCNB1, MCM6, CCNE1, MCM4, MCM2, CCNE2, MCM5, ORC6, MAD2L1, CDC45, BUB1B, MDM2, CDKN1A, UBE2C, MCM7, CCNB2                                      |
| MC/6x | REACTOME | E2F_MEDIATED_REGULATION_OF_DNA_REPLICATION | 0,000 | up | 10/157 | 30/4186  | CDK1, TYMS, CCNB1, CCNE1, ORC6, CDT1, CDC45, E2F1, PRIM2, RRM2                                                                                              |
| MC/6x | REACTOME | BIOLOGICAL_OXIDATIONS                      | 0,000 | up | 15/157 | 80/4186  | UGDH, ADH1C, PTGS2, GCLM, CYP1A1, GCLC, GSTM5, GSTA5, MGST2, CYP26B1, GSTM1, ALDH1A1, FMO1, SULT1B1, UGT2B17                                                |
| MC/6x | REACTOME | G2_M_CHECKPOINTS                           | 0,000 | up | 10/157 | 34/4186  | CDK1, CCNB1, MCM6, MCM4, MCM2, MCM5, ORC6, CDC45, MCM7, CCNB2                                                                                               |

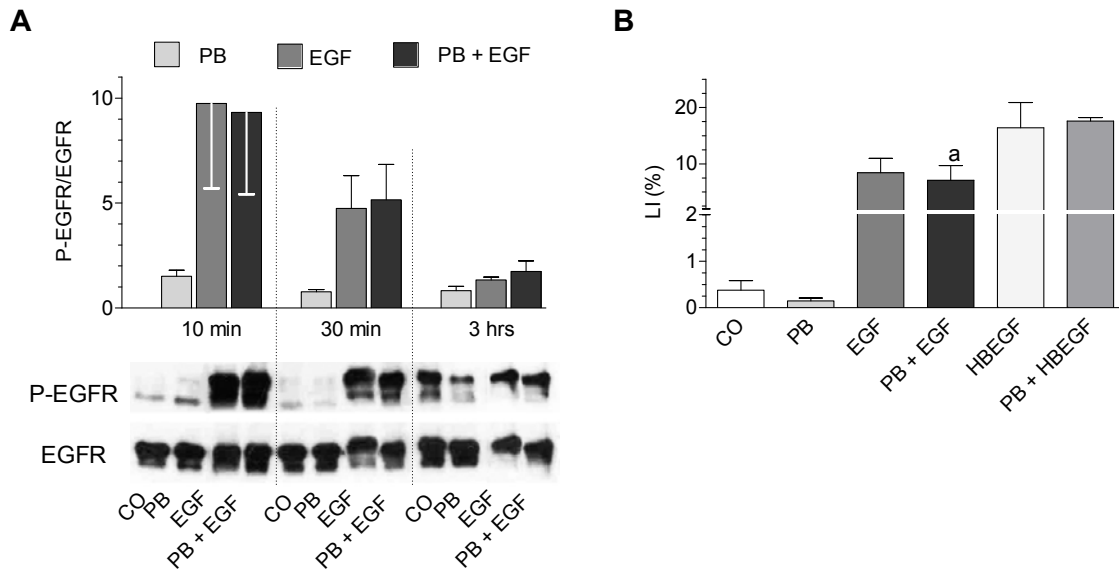

**Figure S3. PB treatment does not impair the EGFR phosphorylation status and DNA synthesis induction by EGF or HBEGF in primary rat HC.** The livers of untreated male Wistar rats were perfused with collagenase. The cell suspension obtained was used to separate HC from MC by low-speed centrifugation in percoll-gradients. HC were seeded onto collagen coated petri dishes and were allowed to attach in Williams medium E containing 10% fetal calf serum. Two hrs after seeding, cells were switched to serum-free Williams medium E and were treated with 1mM PB, 10ng EGF/ml medium and/or 10ng HBEGF/ml medium. (A), Ten min, 30 min or 3hrs after start of treatment proteins were harvested in RIPA buffer [500 mM NaCl, 50 mM Tris (pH7.4), 0.1% SDS, 1% igepal CA630, 0.5% Na-deoxycholate, 0.5 mM sodium orthovanadate, 1 mM phenylmethylsulfonylfluorid; all obtained from Sigma-Aldrich], homogenized by sonication and centrifugation (12.000g, 5 min), and loaded at equal amounts (10  $\mu$ g) onto 10% SDS gels. Separated protein were transferred onto PVDF membranes, incubated with anti-phospho-EGFR antibody (Tyr1173, Cell Signalling) and anti-panEGFR (Cell signalling), and subjected to ECL Plus Western Blotting Detection Kit (GE Healthcare, St Gilles, GB). Bands were evaluated by densitometry (Optimax 2010 X-ray film processor and Quantity One 4.2.1; Bio-Rad, Hercules, CA). Data represent the mean  $\pm$  SD of two independent experiments. (B), After 24 hrs in culture,  $^3$ H-thymidine was added for further 24hrs. HC were harvested, fixed and subjected to autoradiography to determine the percentage of nuclei with incorporated  $^3$ H-thymidine (LI %). In each of the experiments at least 2000 HC nuclei were counted. Data are means  $\pm$  SD of  $\geq 3$  independent experiments.

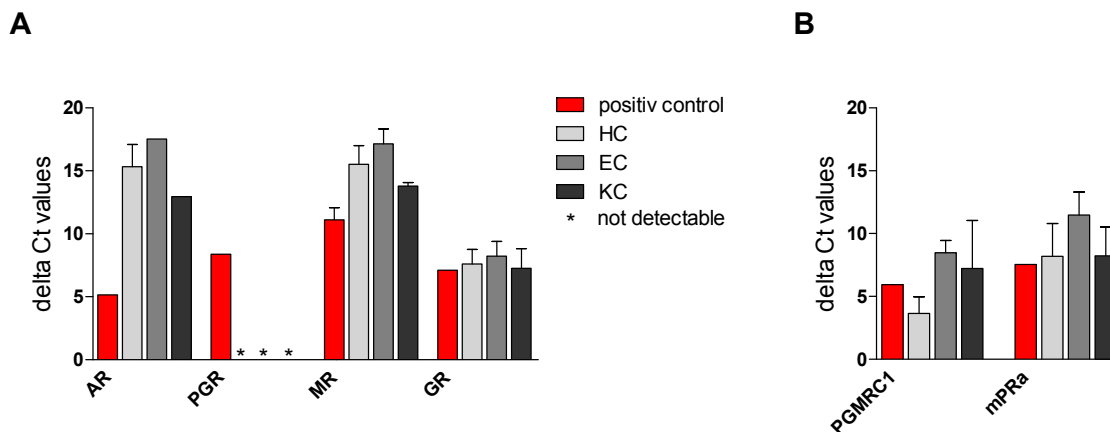

**Figure S4. Expression level of nuclear hormone receptors, PGMRC1 (progesterone membrane receptor component 1) and mPR $\alpha$  (membrane progestin receptor  $\alpha$ ) in cell types of rat liver..** mRNA was obtained from purified rat HC, KC- and EC-enriched fractions, from testis and uterus. Transcript levels of androgen receptor (AR), progesterone receptors (PGR), mineralocorticoid receptors (MR), glucocorticoid receptor (GR), PGMRC1, and mPR $\alpha$  were determined by RT-qPCR and normalized by  $\beta$ 2-microglobulin (deltaCT-values). Primers applied, please see Table S3. Please note that the primers for PGR cover both, PGR $\alpha$  and PGR $\beta$ . The mRNA of testis served as positive control for AR and mRNA of uterus for PGR, MR, GR, PGMRC1, and mPR $\alpha$ . Data are means  $\pm$  SEM derived from  $\geq 3$  independent cell preparations.

Table S3. Primers were obtained from Eurogentec (Seraing, Belgium) for SYBR green-based RT-qPCR.

| <b>Primer</b>                                           |         | <b>Sequence</b>             |
|---------------------------------------------------------|---------|-----------------------------|
| <b>Rat NR3C2</b><br>(mineralocorticoid receptor;<br>MR) | Forward | 5' CAGCGAAACAGATGATCC 3'    |
|                                                         | Reverse | 5' AGCGAACGATGATAGACAC 3'   |
| <b>Rat NR3C3</b><br>(progesteron receptors; PGR)        | Forward | 5'CACAACGCTTCTATCAAC 3'     |
|                                                         | Reverse | 5'GCAGCAATAACTTCAGAC 3'     |
| <b>Rat NR3C4</b><br>(androgen receptor; AR)             | Forward | 5' TGGCGGTCCTTCACTAATGTC 3' |
|                                                         | Reverse | 5' TCACGCACTGGCTGTACATTC 3' |
| <b>Rat NR3C1</b><br>(glucocorticoid receptor; GR)       | Forward | 5'GGCAGTGTGAAATTGTATCC 3'   |
|                                                         | Reverse | 5'CTCTCGTTTGTGTCTTTACC 3'   |
| <b>Rat PGMRC1</b>                                       | Forward | 5'CGTGACCAAAGGCCGCAAG 3'    |
|                                                         | Reverse | 5'TGGGCAGGAGTGAGGTCAG 3'    |
| <b>Rat mPR<math>\alpha</math></b>                       | Forward | 5'TTCAGTGCCCTGGCTCACCTC 3'  |
|                                                         | Reverse | 5'CACGGCCACACCCACATAGTC 3'  |
| <b>Rat <math>\beta</math>2 microgloblin</b>             | Forward | 5'CGCTCGGTGACCGTGATCTT3'    |
|                                                         | Reverse | 5'TCCGGTGGATGGCGAGAGTA3'    |
